# Supplementary material for: The effects of captive versus wild rearing environments on long bone articular surfaces in common chimpanzees (Pan troglodytes)
Source: PeerJ. 2017 Aug 14;5:e3668. doi: 10.7717/peerj.3668 (PMC5560229; doi:10.7717/peerj.3668)
Supplement: Table S1 [file peerj-05-3668-s001.xlsx]

## Sheet: Sheet1
ID	Collection	Sex	Rearing	Femur length (mm)	Tibia Length (mm)	Humerus Length (mm)	Radius Length (mm)	Ulna Length (mm)	FHSI AVG	FHAP AVG	FHDP AVG	MCML AVG	LCML AVG	FCML AVG	MCSI AVG	MCDP AVG	LCSI AVG	LCDP AVG	LPML AVG	LPAP AVG	MPML AVG	MPAP AVG	TPML AVG	TTML AVG	TTAP AVG	HHSI AVG	HHAP AVG	HHDP AVG	TRSIM AVG	TRSIN AVG	TRSIL AVG	TRSI AVG	TRML AVG	TRAPM AVG	TRAPN AVG	TRAPL AVG	TRAP AVG	CPSI AVG	CPML AVG	CPDP AVG	HDML AVG	RHML AVG	RHAP AVG	RCML AVG	RCAP AVG	UTMLI AVG	UTMLN AVG	UTMLS AVG	UTML AVG
AP	Primate Foundation of Arizona	F	Captive	289	246.5	299.5	265.5	278.5	33.33	33.52	25.8633	20.2433	21.5133	53.7133	39.86	19.0367	35.92	15.3233	26.72	32.3	21.06	30.69	60.22	21.72	25.3567	39.1933	38.6133	20.1767	22.1	14.0767	21.2333	19.1367	24.0133	26.84	16.45	29.5367	24.2756	22.2667	16.38	8.28	46.1867	24.8567	24.8267	24.4533	17.69	23.9	18.1233	24.08	22.0344
CQ	Primate Foundation of Arizona	F	Captive	287.5	255.5	306	285	300.5	33.6467	34.1767	18.8567	21.41	18.0933	55.5333	33.3733	15.5033	32.0767	15.09	24.1633	28.34	23.3433	33.83	59.13	22.3133	25.1133	39.9667	39.6467	17.5833	21.3367	12.4233	18.55	17.4367	24.7367	25.88	15.2767	26.2667	22.4744	18.9533	17.84	7.6	45.1233	23.74	24.95	28.9133	17.4467	23.8633	17.9933	23.79	21.8822
JE	Primate Foundation of Arizona	F	Captive	249.5	223	258.5	248.5	263.5	29.6833	30.0433	23.42	20.5867	14.85	46.57	35.0967	20.33	30.06	13.9733	22.2167	30.32	22.7533	29.88	54.69	24.6967	22.1567	34.39	36.2667	15.5933	18.8633	11.8433	14.62	15.1089	17.6767	22.3367	11.7333	14.5033	16.1911	18.1967	16.8033	6.56333	39.4233	21.02	22.17	23.8167	16.06	23.8567	19.3867	23.65	22.2978
KI	Primate Foundation of Arizona	F	Captive	263.5	225.5	260.5	246.5	259.5	29.2	29.4767	21.9067	19.98	16.8333	52.9033	36.7267	17.4133	29.6033	12.4533	23.4133	30.5067	23.13	32.5	56.4267	19.92	20.5667	35.5067	36.3033	15.0133	20.2733	10.2567	16.2467	15.5922	21.1467	23.5133	11.8333	24.93	20.0922	18.8167	15.52	6.99667	42.5933	21.6667	21.9433	25.2633	15.5133	24.4467	15.1667	23.0667	20.8933
PR	Primate Foundation of Arizona	F	Captive	282.5	229	282.5	260.5	260.5	28.6233	29.2667	19.2467	14.44	15.9	47.58	30.7	16.6767	31.54	13.6833	21.6833	27.2567	22.2333	26.3867	53.45	21.17	20.2733	33.9633	36.93	18.6133	20.3233	13.68	17.12	17.0411	17.6533	20.68	14.7467	24.79	20.0722	17.94	15.4833	5.06667	33.21	21.8267	22.1167	22.1267	14.7833	18.3867	12.2733	21.4133	17.3578
TR	Primate Foundation of Arizona	F	Captive	295	260.5	296.5	282	299	32.23	32.34	23.8267	21.67	18.2	53.86	35.19	22.5433	31.24	14.4267	22.9833	28.2933	23.0433	38.1133	57.22	20.8467	18.3533	37.7667	40.7	18.9133	22.42	10.78	20.09	17.7633	22.19	23.6833	12.3833	26.62	20.8956	21.6267	15.9233	8.51667	38.1833	23.7767	24.5167	25.88	15.6	27.4233	19.1467	23.03	23.2
DO	Primate Foundation of Arizona	F	Captive	281	250.5	290	271	278.5	34.65	34.8667	25.77	21.8567	14.0667	52.33	35.1367	19.9167	30.44	15.4133	22.4333	30.82	23.6833	32.2867	55.58	21.1633	19.72	35.53	40.6467	17.82	20.0633	10.4433	17.6767	16.0611	25.8167	22.6967	12.03	26.1067	20.2778	20.6067	16.25	8.25	37.1833	23.8267	22.0967	12.77	18.0533	25.15	16.1133	22.1367	21.1333
JU	Primate Foundation of Arizona	F	Captive	285	242	297	260.5	279	29.61	29.8233	19.8667	21.44	15.6867	52.0533	32.9533	19.2133	30.5267	14.2967	20.8433	24.5167	20.74	32.0667	53.9333	19.9733	21.1633	37.07	38.8767	15.3833	22.21	12.7	19.29	18.0667	22.97	23.8933	14.2367	19.4367	19.1889	17.2933	14.5133	6.38333	39.7	22.78	23.52	25.6	15.6	23.3233	12.35	20.2567	18.6433
LO	Primate Foundation of Arizona	F	Captive	345	294	344.5	307	315	35.39	34.8	21.58	23.18	18.1633	56.6233	36.76	20.7533	31.5433	14.12	28.9767	33.16	25.0633	38.7633	60.1433	23.69	22.3867	38.2133	40.28	18.52	24.78	13.0567	22.39	20.0756	26.2	22.84	14.2033	26.05	21.0311	19.47	15.3633	7.51333	41.6933	25.1733	25.8667	25.6467	14.5067	26.7	8.5	22.61	19.27
SA	Primate Foundation of Arizona	F	Captive	275.5	232	276	258.5	271	31.2033	31.5733	21.16	19.54	15.9167	50.6267	34.16	22.3233	30.82	12.86	23.4733	28.9667	24.0667	31.2033	54.9567	21.22	20.0267	35.6833	39.4933	14.6333	22.2567	12.6767	16.2333	17.0556	26	24.1767	15.1633	20.4267	19.9222	18.2733	16.7067	6.63	40.8867	21.4567	24.3	26.63	17.0667	24.0967	17.2633	20.19	20.5167
BB	Primate Foundation of Arizona	M	Captive	271	230.5	273.5	253.5	270	30.4467	30.9767	19.3167	20.6367	17.78	55.37	34.9	25.32	34.91	16.7367	21.7867	29.6933	22.82	31.0467	56.78	24.6867	20.8633	34.0967	37.2067	14.3	21.93	13.7333	18.9333	18.1989	23.9667	23.3367	15.03	20.09	19.4856	19.2	16.6167	7.27667	40.2033	22.5533	23.0733	27.9833	16.7833	25.0833	15.9433	19.57	20.1989
PD	Primate Foundation of Arizona	M	Captive	307	261	312.5	283.5	297.5	35.41	35.7367	25.7233	22.4867	20.15	58.71	38.2367	22.8467	38.6267	19.3	27.8367	35.4167	21.31	34.1967	60.2567	22.3833	21.0667	42.0733	44.06	15.56	23.2933	11.8767	21.6967	18.9556	28.0333	26.1267	15.8933	26.99	23.0033	22.59	18.2367	7.21333	49.6067	26.4367	27.3067	28.83	19.0867	27.5667	18.76	22.3967	22.9078
LI	Primate Foundation of Arizona	M	Captive	299	263	307	295	310	35.65	35.84	23.6867	23.3	18.5333	55.9967	37.4433	22.6367	34.8433	15.5367	24.1933	31.7767	22.1867	35.2433	60.0433	23.5733	21.8833	38.83	42.4433	14.5833	24.1833	13.4067	18.9467	18.8456	27.3333	25.6267	15.5733	28.46	23.22	21.81	17.3733	7.2	46.03	25.06	26.9867	29.98	17.78	28.77	16.7033	22.6867	22.72
CC	Primate Foundation of Arizona	M	Captive	262.5	217	254	248	263.5	32.42	32.4567	22.2167	19.37	18.0567	55.2267	35.2	17.0067	28.5533	11.9467	22.9267	31.1467	21.28	32.7567	58.6433	22.4567	17.7867	37.5467	41.51	11.3133	20.92	12.8767	18.23	17.3422	25.0667	24.4733	14.69	28.2433	22.4689	19.16	17.7567	7.33333	39.76	23.8933	24.69	30.5933	19.4833	27.2867	15.4333	25.66	22.7933
CH	Arizona State University	M	Captive	300	253	281.5	281.5	290	32.7433	32.8333	25.1367	23.16	17.66	59.6	37.9467	19.87	35.8833	16.85	24.9633	31.9767	24.5233	35.04	61.63	24.0833	23.9967	37.1033	39.7667	14.42	21.8567	11.7967	18.1333	17.2622	26.47	25.9933	15.2767	20.35	20.54	21.2267	17.53	9.63333	46.4967	24.3433	25.96	30.2967	19.7333	27.7233	14.7767	26.5233	23.0078
PN	Arizona State University	M	Captive	294.5	261.5	286	277	290.5	31.5967	32.5167	22.38	21.9333	18.9067	57.9967	38.54	20.69	33.7867	16.2567	24.7667	30.7367	22.3033	34.45	58.0033	19.53	25.44	37.9033	41.36	14.19	21.1	10.43	17.4367	16.3222	24.7967	24.59	14.34	20.9467	19.9589	20.8967	17.1667	10.62	43.4633	24.8767	23.9067	29.2233	22.79	26.9433	9.20333	23.8767	20.0078
DA	Arizona State University	M	Captive	275	241.5	279	269.5	286.5	34.3867	34.0667	26.5333	22.5467	20.05	59.63	39.66	21.42	34.3667	19.7167	27.2867	29.75	23.9533	34.5833	61.5233	23.77	23.4867	36.8	42.05	18.37	22.27	11.3667	16.37	16.6689	23.5267	26.6633	13.2067	18.4833	19.4511	20.8667	17.7867	9.2	46.2933	25.47	26.82	28.3933	16.74	26.9333	16.76	25.38	23.0244
TO	Arizona State University	M	Captive	294	256	305	285	299	32.3767	32.75	20.15	22.4933	18.9667	60.8567	38.48	25.22	34.0567	15.7833	23.6233	29.9067	24.97	35.2767	60.0867	22.82	21.27	39.2167	38.64	16.0267	23.1333	10.8633	18.4633	17.4867	23.1167	26.17	15.5533	19.6833	20.4689	20.6267	18.6233	6.43333	46.0433	24.4833	25.7067	30.0233	18.5733	25.9233	21.07	23.3167	23.4367
SM	Primate Foundation of Arizona	M	Captive	280.5	225	278	246	260	33.83	34	23.4433	22.7767	19.18	62.2267	39.0167	26.0933	35.3267	16.9467	23.2167	32.4933	20.78	30.8933	59.34	20.2733	21.3733	37.1967	41.41	13.29	23.03	8.64667	18.85	16.8422	23.1833	24.37	13.3	19.8467	19.1722	20.7967	16.5667	8.71667	44.0733	24.0233	24.9533	27.67	18.8833	26.35	20.0833	19.3133	21.9156
ED	Arizona State University	M	Captive	308	260.5	304	295	309.5	34.55	34.6333	24.0133	24.4767	18.6767	60.7967	38.8767	26.1933	37.4967	18.72	24.6933	31.4833	24.2	37	61.54	22.5733	22.3267	39.3167	42.9467	15.7	23.27	15.55	18.26	19.0267	22.1933	24.8167	16.2967	20.9833	20.6989	22.3167	18.7367	7.95333	45.7433	25.0967	25.9533	31.7	17.8433	27.88	18.6233	25.56	24.0211
HTB 1056	Cleveland Museum of Natural History	M	Wild	330	279	322	294	309	35.3233	35.61	24.3067	23.4267	18.7867	62.4267	37.13	18.7767	35.7133	17.0367	25.96	32.0433	24.7667	34.6367	63.46	23.9233	21.7867	39.44	45.2	14.8267	26.4667	11.42	19.5867	19.1578	25.5967	30.11	15.3967	22.4633	22.6567	21.6133	17.6967	8.16	49.6533	25.5467	25.6033	29.1767	18.7167	28.59	14.9667	23.72	22.4256
HTB 1708	Cleveland Museum of Natural History	M	Wild	280	245	287	278	292	34.5067	34.5033	22.77	22.18	18.5567	56.1233	38.22	19.63	32.13	14.5333	22.8133	29.7467	22.07	32.6067	58.5867	20.5733	21.97	39.7367	42.9367	19.0767	23.9733	12.5833	20.49	19.0156	27.5633	29.8	16.3233	23.9	23.3411	23.7033	16.6133	6.51667	43.1233	24.1333	24.83	27.4867	14.5567	27.0033	18.5133	21.7167	22.4111
HTB 1720	Cleveland Museum of Natural History	F	Wild	297	245	303	269	286	29.9467	30.1933	23.1433	19.7867	15.2333	49.5733	32.6367	19.16	29.52	14.4567	23.14	25.8367	19.7233	31.1567	53.4933	20.1933	21.1767	34.9333	37.4767	14.1233	21.3733	10.9233	17.4567	16.5844	22.7	26.08	13.62	18.9933	19.5644	18.8267	14.4967	6.20667	42.8	22.2167	23.0533	24.8433	15.51	24.6767	15.4267	16.5033	18.8689
HTB 1713	Cleveland Museum of Natural History	F	Wild	291	244	293	261	274	31.4533	32.15	21.8433	22.7833	17.65	55.03	38.2167	19.0767	30.45	13.5067	21.4633	28.4767	22.42	32.8433	57.13	19.5667	18.4267	39.5133	38.3067	13.92	20.9367	11.17	17.9	16.6689	22.39	25.52	14.3433	20.91	20.2578	20.0667	16.32	7.12333	39.9733	22.08	23.65	23.7067	16.5733	22.54	16.01	17.0367	18.5289
HTB 1718	Cleveland Museum of Natural History	M	Wild	309	250	300	288	303	32.66	32.6767	24.4933	21.94	18.76	55.8767	36.6167	21.0233	32.7067	14.4133	23.0467	28.5733	21.43	37.4967	57.7767	27.3933	20.06	43.6167	42.0767	18.8967	24.69	11.66	22.97	19.7733	24.1233	28.3	18.55	26.0967	24.3156	23.2367	17.0533	7.62	44.0533	25.59	25.8767	30.66	17.2267	27.0867	11.4467	21.2067	19.9133
HTB 1722	Cleveland Museum of Natural History	M	Wild	308	268	324	300	317	36.8767	36.9033	25.85	20.9533	19.2367	58.39	41.28	23.3233	33.6367	14.45	19.7633	30.52	22.1267	35.17	59.7367	28.87	22.4267	38.6833	43.4267	14.21	24.9533	14.8933	22.0567	20.6344	23.68	29.3233	17.1767	23.5067	23.3356	25.2067	18.0733	7.87333	42.94	25.7167	26.6733	28.8167	17.2267	28.88	18.0433	21.9167	22.9467
HTB 1759	Cleveland Museum of Natural History	F	Wild	281	242	295	268	278	31.0767	31.4133	21.2633	19.15	16.29	48.56	34.5967	20.05	31.2533	14.83	20.81	25.8967	20.13	33.56	52.83	21.2333	18.5667	35.8133	39.6567	15.6867	21.9767	10.76	18.1867	16.9744	25.3833	27.7	15.3467	22.6033	21.8833	18.9167	15.52	6.51333	44.5467	22.07	22.7033	25.6133	16.31	23.03	17.7433	17.23	19.3344
HTB 1739	Cleveland Museum of Natural History	M	Wild	291	247	297	277	290	34.2967	34.3333	23.51	19.12	19.4367	53.83	38.6533	20.3267	33.1567	14.4833	19.42	30.2667	21.7733	36.9667	55.7667	26.0633	20.9333	41.0733	42.0667	19.0767	25.3533	10.42	22.8533	19.5422	27.0233	27.87	15.66	23.77	22.4333	24.18	15.72	7.66667	46.1133	24.96	25.16	29.6733	16.6967	28.8367	18.73	19.43	22.3322
HTB 1723	Cleveland Museum of Natural History	F	Wild	286	236	290	277	292	35.37	35.6433	25.3533	24.2633	17.5333	59.13	39.33	20.41	32.53	13.0767	22.91	29.1367	22.3133	36.2333	59.9233	21.8233	23.5	39.8167	42.6633	15.35	23.7033	10.3933	16.75	16.9489	25.1367	28.5933	13.9533	20.6	21.0489	21.4467	18.3233	5.34333	43.35	23.4533	24.7067	29.0233	15.2767	23.51	20.03	20.7533	21.4311
HTB 1748	Cleveland Museum of Natural History	F	Wild	269	216	267	247	261	30.99	30.8733	23.7033	22.4167	17.65	55.5033	36.31	18.6133	32.02	14.32	21.3567	24.81	21.4533	31.7967	55.9	24.1433	21.5067	37.7567	40.0333	17.9067	17.6667	13.2333	17.7767	16.2256	21.37	26.1767	17.5	20.92	21.5322	22.2133	17.7033	6.55667	42.8333	25.4567	25.4133	26.22	14.2267	23.63	12.84	19.1467	18.5389
HTB 1770	Cleveland Museum of Natural History	F	Wild	265	221	276	247	264	30.2333	30.63	18.6267	19.97	15.5	51.4933	31.5767	14.58	30.98	16.5167	21.22	26.1333	18.1033	31.7733	55.5667	24.5533	17.8933	34.7933	37.09	20.6067	20.4333	9.16333	17.4067	15.6678	21.84	24.9467	9.81667	17.7	17.4878	18.83	14.4733	6.90667	41.6567	22.3833	23.0233	24.7067	14.49	24.9567	12.54	18.6467	18.7144
HTB 1775	Cleveland Museum of Natural History	F	Wild	311	261	326	292	307	33.1333	33.4433	22.2833	24.3767	17.98	53.67	36.3167	22.4467	30.3967	11.2433	24.05	25.6267	24.55	35.32	59.8167	26.5267	18.0267	39.3267	42.3733	13.24	20.2967	10.1833	18.96	16.48	25.95	26.1267	15.3667	23.1633	21.5522	20.27	15.4667	7.32333	46.4367	26.7433	27.44	26.51	17.96	29.23	19.3133	17.5733	22.0389
HTB 1843	Cleveland Museum of Natural History	F	Wild	300	257	319	283	295	33.5467	33.99	25.4833	21.1567	17.11	54.6567	37.03	18.1	33.9133	16.0667	21.4967	26.46	21.48	34.1333	57.8	23.2033	21.1467	36.1433	40.85	17.8867	22.32	11.8233	19.5267	17.89	23.3433	24.5067	15.3533	22	20.62	19.0233	17.4867	6.62333	46.18	24.06	24.8033	27.0333	15.7367	25.7833	15.7967	20.41	20.6633
HTB 1853	Cleveland Museum of Natural History	F	Wild	300	265	317	287	290	33.5233	33.8733	22.61	20.3467	18.0933	54.5567	39.0833	23.6433	31.0267	13.6833	24.4133	27.68	22.6867	36.76	58.88	24	22.9933	36.75	40.57	13.9133	20.99	11.0467	18.8067	16.9478	23.7733	26.09	17.38	22.6167	22.0289	20.6867	15.5967	8.48667	43.3767	24.2267	25.0733	28.0667	16.74	25.76	19.7567	17.8767	21.1311
HTB 2071	Cleveland Museum of Natural History	F	Wild	314	271	289	273	288	37.1367	37.1667	30.2367	23.0833	18.8633	62.66	42.57	23.6433	34.7933	17.7933	23.71	32.3833	21.44	36.9333	64.4833	25.3233	22.7167	38.7833	43.3667	18.3033	23.04	11.35	19.19	17.86	22.96	28.74	18.2467	23.0833	23.3567	22.7333	18.13	8.37	46.52	26.66	26.45	28.6067	17.14	27.1533	8.73	22.3833	19.4222
HTB 3552	Cleveland Museum of Natural History	M	Wild	292	253	296	281	292	34.39	34.4833	24.9733	24.2167	18.5367	58.57	38.8233	22.0633	32.6233	11.7867	26.4567	31.9567	25.1167	35.87	62.9867	26.4067	20.58	41.74	43.0333	13.4533	23.66	11.2767	18.3467	17.7611	22.48	28.4567	16.2133	20.4967	21.7222	20.9133	17.2733	7.33	46.5867	25.26	26.4267	28.6767	20.4333	24.9867	17.7033	19.59	20.76
HTB 2072	Cleveland Museum of Natural History	M	Wild	308	261	323	290	314	35.76	36.02	26.4867	23.3667	17.6233	57.15	40.58	20.5167	33.8133	16.3867	21.39	27.65	19.6667	35.8667	57.6533	28.75	22.7867	37.2667	44.2467	18.58	20.1533	9.12333	18.8733	16.05	23.93	28.6033	14.8667	22.36	21.9433	20.1867	16.4533	8.94	46.36	24.1467	24.0633	27.9633	16.71	29.86	14.1733	20.67	21.5678
HTB 1882	Cleveland Museum of Natural History	M	Wild	309	267	323	280	300	32.7967	32.97	20.86	20.5967	18.6967	53.9733	38.3367	20.7033	33.7267	16.67	22.5233	28.79	21.2033	35.6533	55.9267	21.9467	24.4767	38.76	43.1867	21.2733	22.4967	11.31	19.13	17.6456	22.0267	27.69	15.54	21.2633	21.4978	23.1867	17.3567	9.42	44.55	24.3967	24.7633	29.6067	16.18	26.8567	20.71	19.23	22.2656
HTB 2026	Cleveland Museum of Natural History	M	Wild	305	261	307	304	313	36.01	36.18	23.6067	24.6567	20.2467	62.3733	39.94	27.5033	33.5867	14.9967	26.6233	32.19	25.0933	38.8833	67.5233	25.0733	23.7233	41.4633	44.5933	21.33	21.7067	11.0733	17.8667	16.8822	25.8233	30.3	17.67	23.13	23.7	25.3533	18.86	12.36	50.8933	27.73	27.2533	32.07	18.4167	28.6433	18.25	17.9633	21.6189
HTB 2746	Cleveland Museum of Natural History	M	Wild	285	237	300	258	273	33.0167	33.2667	23.92	20.64	17.6133	54.8967	36.61	19.94	30.79	16.8533	20.9133	26.0367	18.41	30.3267	54.95	25.0567	19.8	37.7033	39.99	17.8633	18.3833	7.70333	16.6433	14.2433	21.0967	24.61	15.7067	20.5967	20.3044	20.9633	16.7567	8.02333	43.45	24.1867	24.1533	27.0833	16.1333	24.75	13.6067	17.4767	18.6111
HTB 1758	Cleveland Museum of Natural History	M	Wild	315	265	320	307	315	36.3567	36.0533	25.7267	23.24	17.7833	56.14	38.6733	18.6433	32.6267	14.42	22.0067	30.2933	21.2367	34.2933	60.5033	26.4633	19.0433	38.0633	42.2733	17.9533	23.2067	11.8867	17.9867	17.6933	23.4867	27.9633	15.83	20.22	21.3378	21.27	17.3233	9.58333	45	24.01	24.4433	29.72	15.7567	26.64	18.1633	20.26	21.6878
HTB 2771	Cleveland Museum of Natural History	F	Wild	299	248	297	261	285	29.8367	29.9133	23.2833	22.4533	16.7	53.41	31.4433	14.3133	27.43	13.7433	22.3667	25.1767	19.4767	31.67	54.6167	19.4267	17.81	32.57	37.9267	15.6567	19.1767	9.31333	15.4333	14.6411	19.0433	24.7267	13.3833	19.58	19.23	20.0833	16.8133	6.6	41.3767	22.66	21.92	25.5767	15.4367	24.4267	17.3733	18.5833	20.1278
[truncated: 37 more columns]
